# Supplementary material for: A multi-stage machine learning framework for stepwise prediction of tuberculosis treatment outcomes: Integrating gradient boosted decision trees and feature-level analysis for clinical decision support
Source: Research Square preprint supplement (doi:10.21203/rs.3.rs-7558046/v1), 2025-10-19

**Supplementary information**

**S1 Table. Country treatment outcome statistics**

| **Country** | **Sample Size** | **Failed** | **Cured** | **MDR+** | **No education** | **Unemployed** | **Median BMI** |
| --- | --- | --- | --- | --- | --- | --- | --- |
| Ukraine | 2479 | 951 | 1528 | 1926 | 963 (44.56%) | 1606 (65.6%) | 19.8 (IQR: 4.2) |
| Georgia | 2413 | 211 | 2202 | 595 | 21 (75.0%) | 1760 (74.73%) | 20.3 (IQR: 3.9) |
| Moldova | 1310 | 412 | 898 | 703 | 164 (12.67%) | 799 (63.11%) | 20.3 (IQR: 4.2) |
| Belarus | 987 | 156 | 831 | 786 | 32 (3.24%) | 257 (26.17%) | 21.5 (IQR: 4.0) |
| Romania | 288 | 65 | 223 | 192 | 43 (18.94%) | 94 (36.72%) | 19.85 (IQR: 4.9) |
| Nigeria | 195 | 33 | 162 | 61 | 3 (75.0%) | 2 (50.0%) | 20.0 (IQR: 5.6) |
| Kazakhstan | 174 | 96 | 78 | 146 | 121 (69.54%) | 98 (56.32%) | 20.0 (IQR: 4.47) |
| Azerbaijan | 151 | 63 | 88 | 130 | 32 (21.33%) | 128 (85.91%) | 20.0 (IQR: 3.65) |
| China | 49 | 3 | 46 | 23 | 16 (36.36%) | 13 (26.53%) | 19.0 (IQR: 2.5) |
| Kyrgyzstan | 30 | 1 | 29 | 26 | 8 (28.57%) | 16 (57.14%) | 20.05 (IQR: 2.48) |
| Sth. Africa | 9 | 3 | 6 | 0 | 3 (33.33%) | 6 (66.67%) | 19.5 (IQR: 6.4) |
| India | 6 | 2 | 4 | 0 | 1 (50.0%) | 1 (50.0%) | 20.5 (IQR: 4.9) |
| Senegal | 3 | 1 | 2 | 0 | 1 (33.33%) | 0 (0.0%) | 15.7 (IQR: 1.95) |

IQR: inter-quartile range; Percentage show percentage of the column values disregarding missing values; MDR+ at least multidrug resistant

**S2 Table. Importance of factors linked to treatment outcome**

| **Feature level** | **Feature** | **Importance** | **Feature Group** | **Missing values** | **Highest Correlated Feature (Correlation Value)** |
| --- | --- | --- | --- | --- | --- |
| Demographic | Age of onset | 29 | Age | 0 (0.0%) | Other - comorbidity (0.17) |
| BMI | 21 | BMI | 2475 (30.6%) | Diabetes (0.15) |
| No. daily contacts | 13 | No. daily contacts | 2887 (35.7%) | Capreomycin (0.17) |
| Education | 12 | Education | 0 (0.0%) | GeneXpert test (0.32) |
| Employment | 8 | Employment | 369 (4.6%) | education (0.28) |
| MDR contact | 7 | Social risk factor | 0 (0.0%) | Number of daily contacts (0.11) |
| Alcohol abuse | 5 | Social risk factor | 0 (0.0%) | Current smoker (0.48) |
| Ex-prisoner | 4 | Social risk factor | 0 (0.0%) | Hepatitis C (0.22) |
| Homeless | 4 | Social risk factor | 0 (0.0%) | Patient alcohol abuse (0.15) |
| Gender | 4 | Gender | 0 (0.0%) | Not Reported-social risk (0.2) |
| Worked abroad | 3 | Social risk factor | 0 (0.0%) | country (0.12) |
| Immigrants | 3 | Social risk factor | 0 (0.0%) | Gatifloxacin 0.5 (0.16) |
| Current smoker | 1 | Social risk factor | 0 (0.0%) | Patient alcohol abuse (0.48) |
| Patient drug abuse | 1 | Social risk factor | 0 (0.0%) | Hepatitis C (0.37) |
| Patient alcohol abuse N/K | 1 | Social risk factor | 0 (0.0%) | Patient smoking data not available/unknown (0.7) |
| Not Reported-social risk | 1 | Social risk factor | 0 (0.0%) | country (0.51) |
| Microbiological | Type of resistance | 18 | Type of resistance | 0 (0.0%) | Genexpert test (0.7) |
| Case definition | 12 | Case definition | 0 (0.0%) | Isoniazid (0.29) |
| Negative | 9 | Culture | 0 (0.0%) | Clofazimine (0.36) |
| HIV | 4 | Co-morbidity | 0 (0.0%) | Cotrimoxazol preventive (0.49) |
| Lineage 2 | 4 | Main *Mtb* lineage | 0 (0.0%) | p-aminosalicylic acid (0.27) |
| Unknown result-culture | 4 | Culture | 0 (0.0%) | Negative (0.16) |
| Nonspecific microflora | 4 | Culture | 0 (0.0%) | Bedaquiline (0.22) |
| Hepatitis C | 4 | Co-morbidity | 0 (0.0%) | Patient drug abuse (0.37) |
| GeneXpert test | 4 | Diagnostic | 2489 (30.8%) | type_of_resistance (0.7) |
| lineage2-lineage4 | 4 | Main lineage | 0 (0.0%) | Not specified (0.06) |
| Not_reported-Comorbidity | 3 | Co-morbidity | 0 (0.0%) | Rifampicin (0.4) |
| COVID-19 | 3 | Co-morbidity | 0 (0.0%) | A19.1 (0.12) |
| Not specified | 2 | Co-morbidity | 0 (0.0%) | Prothionamide (0.26) |
| 100 to 200 | 2 | Culture | 0 (0.0%) | Type of resistance (0.16) |
| A19.8 | 2 | Diagnosis code | 0 (0.0%) | Antiretroviral therapy (0.29) |
| A16.0 | 2 | Diagnosis code | 0 (0.0%) | More than 200 (0.14) |
| A15.1 | 2 | Diagnosis code | 0 (0.0%) | Country (0.330) |
| Diabetes | 2 | Co-morbidity | 0 (0.0%) | BMI (0.15) |
| Psychiatric illness | 2 | Co-morbidity | 0 (0.0%) | employment (0.12) |
| Bactec isoniazid | 2 | Bactec isoniazid | 2991 (37.0%) | Bactec rifampicin (0.88) |
| 1 to 19 | 1 | culture | 0 (0.0%) | Negative (0.19) |
| More than 200 | 1 | culture | 0 (0.0%) | Medium cavities (0.18) |
| Other non tb abnormalities | 1 | Other non tb abnormalities | 1898 (23.4%) | Mediastinal lymph nodes present (0.25) |
| 20 to 100 | 1 | culture | 0 (0.0%) | education (0.21) |
| Systemically administered glucocorticoids | 1 | Co-morbidity | 0 (0.0%) | employment (0.06) |
| Hepatitis B | 1 | Co-morbidity | 0 (0.0%) | Hepatitis C (0.19) |
| Hepatic diseases | 1 | Co-morbidity | 0 (0.0%) | Terminated from study (0.14) |
| X-ray | Timika score | 22 | Timika score | 1898 (23.4%) | Overall percent of abnormal volume (0.69) |
| calcified nodule | 8 | calcified nodule | 0 (0.0%) | High density calcified sequella (0.62) |
| Infiltrate low ground glass density | 7 | Infiltrate low ground glass density | 0 (0.0%) | Infiltrate medium density (0.5) |
| Total cavernum | 6 | Total cavernum | 7036 (86.9%) | multiple nodule (0.27) |
| collapse | 5 | collapse | 0 (0.0%) | Infiltrate high density (0.4) |
| Small nodules | 5 | Smal lnodules | 0 (0.0%) | Medium density stablised fibroticnodules (0.75) |
| Medium cavities | 5 | Medium cavities | 0 (0.0%) | Large cavity belong to a multi-sextant cavity (0.69) |
| Overall percent of abnormal volume | 4 | Overall percent of abnormal volume | 0 (0.0%) | Timika score (0.69) |
| no calcified nodule | 4 | No calcified nodule | 0 (0.0%) | Multiple nodule exists (0.76) |
| Small cavities | 4 | Small cavities | 0 (0.0%) | Can multiple cavities be seen (0.49) |
| Large cavities | 4 | Large cavities | 0 (0.0%) | Large cavity belong to a multi-sextant cavity (0.62) |
| Large nodules | 3 | Large nodules | 0 (0.0%) | Non calcified nodule exist (0.27) |
| Lung localisation | 3 | Lung localization | 0 (0.0%) | A18.0 (0.32) |
| Huge nodules | 3 | Huge nodules | 0 (0.0%) | Large nodules (0.19) |
| Low ground glass density active fresh nodules | 3 | Low ground glass density active fresh nodules | 0 (0.0%) | Medium nodules (0.71) |
| Large cavity belong to a multisextant cavity | 2 | Large cavity belong to a multisextant cavity | 0 (0.0%) | Medium cavities (0.69) |
| Medium nodules | 2 | Medium nodules | 0 (0.0%) | Low ground glass density active fresh nodules (0.71) |
| Multiple cavities observed | 1 | Multiple cavities can be seen | 0 (0.0%) | Medium cavities (0.64) |
| Mediastinal lymphnodes present | 1 | Mediastinal lymphnodes present | 1898 (23.4%) | Medium nodules (0.28) |
| Bilateral pleural effusion | 1 | bilateral pleural effusion | 1899 (23.5%) | Collapse (0.12) |
| Infiltrate high density | 1 | Infiltrate high density | 0 (0.0%) | Large cavity belong to a multi-sextant cavity (0.49) |
| Multiple nodule exists | 1 | Are multiple nodule exists | 0 (0.0%) | Non-calcified nodule (0.76) |
| Medium density stablized fibrotic nodules | 1 | Medium density stabalized fibroticnodules | 0 (0.0%) | Small nodules (0.75) |
| High density calcified typically sequella | 1 | High density calcified sequella | 0 (0.0%) | Calcified nodule exist (0.62 |
| Pleural effusion percent of hemithorax involved | 1 | Pleural effusion percent of hemithorax involved | 1898 (23.4%) | Positive (0.17) |
| Treatment | Period span | 65 | Period span | 104 (1.3%) | Capreomycin (0.35) |
| Patient stopped treatment | 16 | Treatment status | 0 (0.0%) | Infiltrate high density (0.15) |
| Pretomanid | 11 | Regimen drug | 0 (0.0%) | Bedaquiline (0.11) |
| Amoxicillin-clavulanate | 8 | Regimen drug | 0 (0.0%) | Imipenem-cilastatin (0.86) |
| Treatment ended | 7 | Treatment status | 0 (0.0%) | Not reported-Comorbidity (0.31) |
| Adverse event | 6 | Treatment status | 0 (0.0%) | Imipenem-cilastatin (0.17) |
| Regimencount | 6 | regimen_count | 0 (0.0%) | Continuation of treatment (0.54) |
| Treatment ineffective due to additional resistance | 5 | Treatment status | 0 (0.0%) | Regimen count (0.19) |
| Streptomycin | 5 | Drug regimen | 0 (0.0%) | Rifampicin (0.18) |
| Antiretroviral therapy | 5 | Drug regimen | 0 (0.0%) | Cotrimoxazol preventive (0.9) |
| p-aminosalicylic acid | 4 | Drug regimen | 0 (0.0%) | Capreomycin (0.51) |
| Ofloxacin | 4 | Drug regimen | 0 (0.0%) | Kanamycin (0.22) |
| Not Reported-regimen drug | 4 | Drug regimen | 0 (0.0%) | Patient alcohol abuse (0.23) |
| Ethionamide | 4 | Drug regimen | 0 (0.0%) | Capreomycin (0.39) |
| Not Reported-treatment status | 4 | Treatment status | 0 (0.0%) | A19.8 (0.27) |
| Capreomycin | 4 | Drug regimen | 0 (0.0%) | p-aminosalicylic acid (0.51) |
| Continuation of treatment | 3 | Treatment status | 0 (0.0%) | Regimen count (0.54) |
| Delamanid | 3 | Drug regimen | 0 (0.0%) | Clofazimine (0.39) |
| Amikacin | 3 | Drug regimen | 0 (0.0%) | Not specified (0.18) |
| Imipenem-cilastatin | 3 | Drug regimen | 0 (0.0%) | Amoxicillin-clavulanate (0.86) |
| Kanamycin | 3 | Drug regimen | 0 (0.0%) | Prothionamide (0.32) |
| Clofazimine | 2 | Drug regimen | 0 (0.0%) | Bedaquiline (0.8) |
| Rifampicin | 2 | Drug regimen | 0 (0.0%) | Isoniazid (0.84) |
| Levofloxacin | 2 | Drug regimen | 0 (0.0%) | Cycloserine (0.53) |
| Linezolid | 2 | Drug regimen | 0 (0.0%) | Bedaquiline (0.79) |
| Clarithromycin | 2 | Drug regimen | 0 (0.0%) | Lineage1-Lineage2 (0.28) |
| Pyrazinamide | 1 | Drug regimen | 0 (0.0%) | Ethambutol (0.56) |
| Prothionamide | 1 | Drug regimen | 0 (0.0%) | Capreomycin (0.42) |
| Isoniazid | 1 | Drug regimen | 0 (0.0%) | Rifampicin (0.84) |
| Ethambutol | 1 | Drug regimen | 0 (0.0%) | Isoniazid (0.81) |
| Bedaquiline | 1 | Drug regimen | 0 (0.0%) | Clofazimine (0.8) |
| New drugs available | 1 | Treatment status | 0 (0.0%) | Large cavity belong to a multi-sextant cavity (0.18) |

Group belonging of the one encoding generated features can be found in Supplemmentary Table5. The detailed explanation for each feature can be found in data dictionary in TB portals webpage: https://tbportals.niaid.nih.gov/user-guides.

**S3 Table. Odds ratios for variables linked to treatment outcome**

| **Features** | **Odds Ratio** | **Adjusted OR**  **(AOR)** | **Feature Importance** |
| --- | --- | --- | --- |
| Treatment ended | 11.02 | 11.11 (7.59-16.27) | 9 |
| Pretomanid | 2.60 | 5.57 (2.58-12.02) | 16 |
| Negative result from bacteria culture | 2.69 | 4.31 (3.47-5.35) | 7 |
| Clofazimine | 0.80 | 1.94 (1.4-2.7) | 3 |
| Patient stopped treatment | 0.02 | 0.11 (0.06-0.22) | 17 |
| Bedaquiline | 0.81 | 1.81 (1.32-2.47) | 2 |
| Treatment ineffective due to additional resistance | 0.29 | 0.29 (0.18-0.45) | 7 |
| Adverse event | 0.14 | 0.33 (0.18-0.61) | 4 |
| Continuation of treatment | 4.72 | 1.66 (1.2-2.29) | 3 |
| HIV | 0.36 | 0.47 (0.34-0.67) | 6 |
| P-aminosalicylic acid | 0.50 | 0.49 (0.36-0.66) | 6 |
| Gender | 1.88 | 1.49 (1.21-1.82) | 2 |
| Capreomycin | 0.68 | 0.51 (0.38-0.68) | 5 |
| Pleural effusion % of hemithorax involved | 0.48 | 0.53 (0.34-0.82) | 1 |
| Ethionamide | 0.36 | 0.54 (0.37-0.79) | 8 |
| Patient alcohol abuse | 0.29 | 0.55 (0.44-0.7) | 5 |
| Amikacin | 0.48 | 0.61 (0.43-0.86) | 1 |
| Amoxicillin-clavulanate | 0.39 | 0.61 (0.38-0.99) | 7 |
| 100 to 200 bacteria colonies from culture | 0.57 | 0.63 (0.5-0.78) | 4 |
| Lineage 2 | 0.73 | 0.66 (0.53-0.82) | 3 |
| >200 bacteria colonies from culture | 0.49 | 0.67 (0.51-0.86) | 2 |
| Delamanid | 0.62 | 0.71 (0.53-0.95) | 2 |
| Type of resistance | 0.71 | 0.72 (0.65-0.8) | 16 |
| Regimen count | 1.93 | 1.26 (1.06-1.49) | 8 |
| Medium cavities | 0.73 | 0.75 (0.6-0.95) | 5 |
| Collapse in lung | 0.71 | 0.76 (0.62-0.93) | 6 |
| Case definition | 1.48 | 1.22 (1.14-1.3) | 17 |
| Non-calcified nodule | 1.11 | 1.17 (1.03-1.32) | 2 |
| Infiltrate low ground glass density | 1.10 | 1.13 (1.04-1.24) | 8 |
| Multiple nodule | 1.02 | 0.88 (0.79-0.99) | 1 |
| Number of daily contacts | 1.05 | 1.1 (1.04-1.16) | 16 |
| BMI | 1.13 | 1.04 (1.01-1.07) | 22 |
| Age of onset | 0.98 | 0.98 (0.97-0.99) | 34 |

BMI: body mass index

**S4 Table. Ordinal feature conversion**

| **Feature** | **Mapping** |
| --- | --- |
| Genexpert test | Not Reported = NaN, S = 0, I = 1, I, S = 1, R, S = 2, R = 3 |
| Bactec rifampicin | Not Reported = NaN, S = 0, I = 1, I, S = 1, R, S = 2, R = 3 |
| Bactec isoniazid | Not Reported = NaN, S = 0, I = 1, I, S = 1, R, S = 2, R = 3 |
| Bactec ethambutol | Not Reported = NaN, S = 0, I = 1, I, R = 2, R, S = 2, R = 3 |
| Overall percent of abnormal_volume | Less than 50 = 1, Not reported = NaN, 0 = 0, 0, Less than 50 = 0, Not Reported = 0, Greater than or equal to 50 = 2, Greater than or equal to 50, Less than 50 = 2 |
| Pleural effusion percent of hemithorax involved | Less than 50 = 1, Not reported = 1, 0 = 0, 0, Less than 50 = 0, Not Reported = NaN, Greater than or equal to 50 = 2, Greater than or equal to 50, Less than 50 = 2 |
| Is pleural effusion bilateral | No = 0, Not Reported = NaN, Yes = 1, No, Yes = 1 |
| Other non tb abnormalities | No = 0, Not Reported = NaN, Yes = 1, No, Yes = 1 |
| Are mediastinal lymphnodes present | No = 0, Not Reported = NaN, Yes = 1, No, Yes = 1 |
| education | Not Reported = NaN, No education = 0, Basic school (incl. primary) = 1, Complete school (a-level, gymnasium) = 2, College (bachelor) = 3 |
| gender | Male = 0, Female = 1, Not Reported = NaN |
| Type of resistance | Sensitive = 1, Mono DR = 2, Poly DR = 3, MDR non XDR = 4, Pre-XDR = 5, XDR = 6, Not Reported = NaN |
| employment | Unemployed = 0, Self-employed = 1, Unofficially employed = 2, Employed = 3, Retired = 4, Homemaker = 5, Student = 6, Disabled = 7, Not Reported = NaN |
| Total cavernum | No cavities = 0, 1 cavity = 1, 2 cavities = 2, More than 2 cavities = 3, 2 cavities, More than 2 cavities = 3, 1 cavity, No cavities = 1, 1 cavity, More than 2 cavities = 3, More than 2 cavities, No cavities = 3, 2 cavities, No cavities = 2, 1 cavity, 2 cavities = 2, Not Reported = NaN |
| Case definition | Unknown = NaN, Other = 1, Lost to follow up = 2, Chronic TB = 3, Relapse = 4, Failure = 5, New = 6 |
| Number of daily contacts | >10 = 11 |
| Lung localization | Pulmonary = 0, Pulmonary and Extrapulmonary = 1, Extrapulmonary = 2, Unknown = NaN |

The detailed explanation for each feature can be found in data dictionary in TB portals webpage: https://tbportals.niaid.nih.gov/user-guides.

**S5**. **Table. Feature one-hot encoding**

| **Group** | **Features** |
| --- | --- |
| Main lineage | La1, La2, lineage1, lineage1-lineage2, lineage2, lineage2-lineage4, lineage3, lineage3-lineage4, lineage4 |
| Culture | 1 to 19, 100 to 200, 20 to 100, MOTT, More than 200, Negative, Nonspecific microflora, Not_Reported-culture, Not done-culture, Positive, Study in progress, Unknown_result-culture |
| Regimen drug | Amikacin, Aminoglycosides - injectible agents, Amoxicillin-clavulanate, Antiretroviral therapy, Bedaquiline, Capreomycin, Clarithromycin, Clofazimine, Cotrimoxazol preventive, Cycloserine, Delamanid, Ethambutol, Ethionamide, Fluoroquinolones, Gatifloxacin, Gatifloxacin 0.5, Imipenem-cilastatin, Isoniazid, Kanamycin, Levofloxacin, Linezolid, Moxifloxacin, Mycobutin, Not_Reported-regimen_drug, Ofloxacin, Pretomanid, Prothionamide, Pyrazinamide, Rifampicin, Streptomycin, Terizidone, p-aminosalicylic acid |
| Treatment status | Adverse event, Continuation of treatment, Drug(s) no longer available, New drugs available, Not_Reported-treatment_status, Patient stopped treatment, Terminated from study, Treatment ended, Treatment ineffective due to additional resistance |
| Social risk factors | Current smoker, Documented MDR contact, Ex prisoner, Homeless, Immigrants, Not_Reported-social_risk, Patient alcohol abuse, Patient alcohol abuse not available/unknown, Patient drug abuse, Patient smoking data not available/unknown, TB care worker, Worked abroad, internal migrants, refugees |
| Comorbidity | TNF-Œ± antagonists, Anemia, COVID-19, Diabetes, HIV, Hepatic diseases, Hepatitis B, Hepatitis C, None, Not specified, Not_reported-Comorbidity, Others, Pneumoconiosis, Post-COVID-19, Psychiatric illness, Renal disease, Systemically administered glucocorticoids, cytostatics |
| Diagnosis code | A15.0, A15.1, A15.2, A15.3, A15.4, A15.5, A15.6, A15.7, A15.8, A15.9, A16, A16.0, A16.2, A16.3, A16.5, A16.8, A17.0, A18.0, A18.1, A18.2, A18.3, A18.4, A18.7, A18.8, A19.0, A19.1, A19.8, A19.9 |

The detailed explanation for each feature can be found in data dictionary in TB portals webpage: https://tbportals.niaid.nih.gov/user-guides.

**S1 Figure. Full data tree with depth of 5**


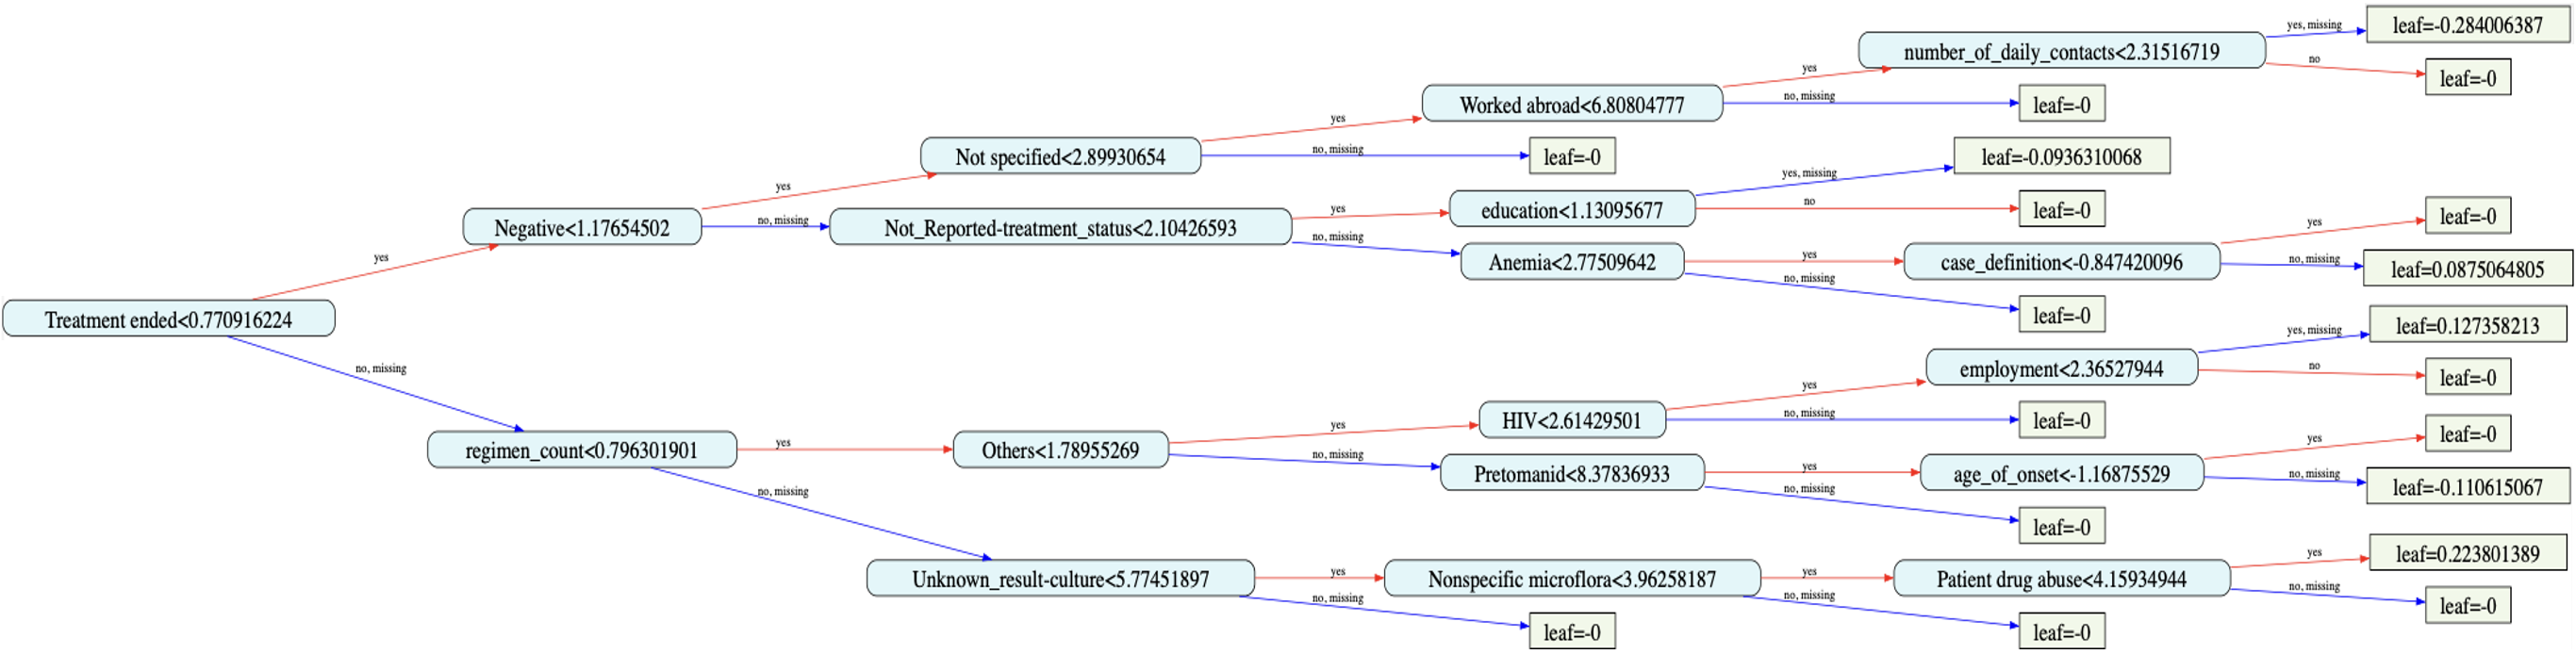

Supplement: Supplementary file 1 [file 101e098c92e8b56a612bf48c.docx]
